# Supplementary material
Source: publisher figshare collection journal article supplement (https://sage.figshare.com/ndownloader/files/24159404)
Supplement: Supplementary file 1 [file 24159404]

| Aspect #1 | Total Comments | +/- | 10 minutes | 45 minutes |
| --- | --- | --- | --- | --- |
| Blank (*n*=22) |  |  |  |  |
|  | Gray walls | - | Gray walls |  |
|  | Blank walls - | - |  | Blank walls - |
|  | Neutral color scheme | - |  | Neutral color scheme |
|  | Everything is similar colors | - | Everything is similar colors |  |
|  | The bed | - | The bed |  |
|  | The lack of interactive objects within the room. I am not a huge fan of magazines and I would have nothing else to do in this room beside agonize and perhaps check my phone. The colors of the walls differed too and seemed quite bland | - |  | The lack of interactive objects within the room. I am not a huge fan of magazines and I would have nothing else to do in this room beside agonize and perhaps check my phone. The colors of the walls differed too and seemed quite bland |
|  | Magazine rack | + |  | Magazine rack |
|  | No comment | - | No comment |  |
|  | Paper bench/bed quality | - | Paper bench/bed quality |  |
|  | Blank walls | - |  | Blank walls |
|  | Blank walls | - | Blank walls |  |
|  | Fluorescent lighting | - |  | Fluorescent lighting |
|  | It looked like a jail cell | - |  | It looked like a jail cell |
|  | bed | + | bed |  |
|  | The plain walls | - |  | The plain walls |
|  | Dark lighting | - | Dark lighting |  |
|  | Bare walls | - |  | Bare walls |
|  | Wall was bare | - | Wall was bare |  |
|  | Blank walls (no art or other decorations) | - |  | Blank walls (no art or other decorations) |
|  | Magazine rack | + |  | Magazine rack |
|  | lighting | - | lighting |  |
|  | Blank walls | - | Blank walls |  |
| Aspect #1  Small (*n*=19) |  |  |  |  |
|  | pillow | - |  | pillow |
|  | The lack of art or distraction | - | The lack of art or distraction |  |
|  | The room seemed cramped | - |  | The room seemed cramped |
|  | Wall color | - |  | Wall color |
|  | Similar to what I have experienced in the past | + | Similar to what I have experienced in the past |  |
|  | bed | - |  | bed |
|  | picture | + |  | picture |
|  | picture | + | picture |  |
|  | Torn and crumpled paper on the exam table | - |  | Torn and crumpled paper on the exam table |
|  | bland | - | bland |  |
|  | Painting on the wall | + | Painting on the wall |  |
|  | Color of the walls | - | Color of the walls |  |
|  | Lack of decorations | - |  | Lack of decorations |
|  | Mostly empty walls (minus the small photograph) | - | Mostly empty walls (minus the small photograph) |  |
|  | No decoration of diagrams | - |  | No decoration or diagrams |
|  | Only one picture | - | Only one picture |  |
|  | Photograph of nature | + |  | Photograph of nature |
|  | wallpaper | + | wallpaper |  |
|  | The picture on the wall seems forced and a half-hearted attempt to make the room more welcoming | - |  | The picture on the wall seems forced and a half-hearted attempt to make the room more welcoming |
| Aspect #1  Medium  (*n* = 20) |  |  |  |  |
|  | The doctor taking 45 minutes to come into the room | - |  | The doctor taking 45 minutes to come into the room |
|  | The single picture on the wall | + | The single picture on the wall |  |
|  | The picture on the wall | + | The picture on the wall |  |
|  | The size | - | The size |  |
|  | emptiness | - |  | emptiness |
|  | picture | + |  | picture |
|  | Messily placed paper on bed | - |  | Messily placed paper on bed |
|  | picture | + | picture |  |
|  | The picture of the beach | + |  | The picture of the beach |
|  | painting | + | painting |  |
|  | Had to wait 45 minutes for care | _ |  | Had to wait 45 minutes for care |
|  | The painting hanging above the exam table | + | The painting hanging above the exam table |  |
|  | Small, cramped | - |  | Small cramped |
|  | space | + | space |  |
|  | The one image on the wall | + |  | The one image on the wall |
|  | Photograph/painting | - |  | Photograph/painting |
|  | Painting on the all | + | Painting on the wall |  |
|  | wall | + | wall |  |
|  | wall | - |  | wall |
|  | Exam bed with paper sheet | - | Exam bed with paper sheet |  |
| Aspect #1  Large  (*n* =22) |  |  |  |  |
|  | The color of the walls | - |  | The color of the walls |
|  | The picture | + | The picture |  |
|  | The size of the room | - |  | The size of the room |
|  | The paper on the exam bed/table was not neatly on the thing | - | The paper on the exam bed/table was not neatly on the thing |  |
|  | The mountains in the painting | + | The mountains in the painting |  |
|  | The image | + |  | The image |
|  | How big the picture was | - |  | How big the picture was |
|  | The picture on the wall | - | The picture on the wall |  |
|  | positive | + | positive |  |
|  | The physician was 45 minutes late | - |  | The physician was 45 minutes late |
|  | The room was not very neat | - |  | The room was not very neat |
|  | The picture on the wall | + |  | The picture on the wall |
|  | The picture | + | The picture |  |
|  | The painting on the wall | + |  | The painting on the wall |
|  | Dark/gray paint on the walls | - | Dark/gray paint on the walls |  |
|  | painting | + | painting |  |
|  | The picture | + | The picture |  |
|  | The dark walls make the room seemed confined | - | The dark walls make the room seemed confined |  |
|  | The picture on the wall | + | The picture on the wall |  |
|  | The large picture on the wall | + |  | The large picture on the wall |
|  | The picture on the wall | + | The picture on the wall |  |
|  | picture | + |  | picture |
|  |  |  |  |  |
| Aspect #2  Blank (*n* = 22) | Lack of decoration or color | - | Lack of decoration or color |  |
|  | Paper was kind of thrown on the table and looked uncomfortable | - |  | Paper was kind of thrown on the table and looked uncomfortable |
|  | magazines | + |  | magazines |
|  | The hospital bed seemed sad | - | The hospital bed seemed sad |  |
|  | The wall color | - | The wall color |  |
|  | The exam table had a misaligned/folded sheet on top of it. That signifies that the staff are not being careful and meticulous with their work. | - |  | The exam table had a misaligned/folded sheet on top of it. That signifies that the staff are not being careful and meticulous with their work. |
|  | Coat hanger | + |  | Coat hanger |
|  | No comment | - | No comment |  |
|  | lighting | - | lighting |  |
|  | Barely any furniture | - |  | Barely any furniture |
|  | Uncomfortable bed | - | Uncomfortable bed |  |
|  | No art or pictures on the walls | - |  | No art or pictures on the walls |
|  | The bed looked very uncomfortable | - |  | The bed looked very uncomfortable |
|  | walls | + | walls |  |
|  | The sheet on the bed | - |  | The sheet on the bed |
|  | The sheet that covers the table wasn’t on all the way | - | The sheet that covers the table wasn’t on all the way |  |
|  | Nothing interactive | - |  | Nothing interactive |
|  | The table didn’t look very welcoming | - | The table didn’t look very welcoming |  |
|  | Neutral colors | - |  | Neutral colors |
|  | Beige walls, no windows | - |  | Beige walls, no windows |
|  | Blank walls | - | Blank walls |  |
|  | No natural light | - | No natural light |  |
| Aspect #2  Small  (*n* = 19) |  |  |  |  |
|  | Sheet of paper | - |  | Sheet of paper |
|  | Minimalist organization | + | Minimalist organization |  |
|  | The room was poorly decorated | - |  | The room was poorly decorated |
|  | Time waited | - |  | Time waited |
|  | Clean and simple | + | Clean and simple |  |
|  | Picture | - |  | Picture |
|  | lighting | - |  | lighting |
|  | Sheet of paper on chair | - | Sheet of paper on chair |  |
|  | Empty walls | - |  | Empty walls |
|  | clean | + | clean |  |
|  | chairs | + | chairs |  |
|  | art | + | art |  |
|  | Magazine rack | + |  | Magazine rack |
|  | Lack of furniture | - | Lack of furniture |  |
|  | White walls | - |  | White walls |
|  | No window | - | No window |  |
|  | Doctor was 45 minutes late | - |  | Doctor was 45 minutes late |
|  | decoration | - | decoration |  |
|  | The walls are too bare | - |  | The walls are too bare |
| Aspect # 2  Medium  (*n*=20) |  |  |  |  |
|  | The painting | + |  | The painting |
|  | The fact that the only things seen in the exam room the examination table and a wall with only one picture | + | The fact that the only things seen in the exam room the examination table and a wall with only one picture |  |
|  | The sanitizing paper on the chair was sloppy | - | The sanitizing paper on the chair was sloppy |  |
|  | The poster | + | The poster |  |
|  | bed | - |  | bed |
|  | Wall space | - |  | Wall space |
|  | painting | + |  | Painting |
|  | size | - | size |  |
|  | There was no clutter | + |  | There was no clutter |
|  | clean | + | Clean |  |
|  | Room looked small | - |  | Room looked small |
|  | The extra chairs around the room | + | The extra chairs around the room |  |
|  | Empty, under-decorated, and bland | - |  | Empty, under-decorated, and bland |
|  | Could have been more décor rather than just one picture to feel more at home | - | Could have been more décor rather than just one picture to feel more at home |  |
|  | Mostly empty walls | - |  | Mostly empty walls |
|  | Paper on exam table was crumpled as if it had already been used | - |  | Paper on exam table was crumpled as if it had already been used |
|  | Rack of magazines | + | Rack of magazines |  |
|  | The paper laid on the bed | - | The paper laid on the bed |  |
|  | The 45 minute wait | - |  | The 45 minute wait |
|  | Single painting on the wall | - | Single painting on the wall |  |
| Aspect # 2  Large  (*n* = 22) |  |  |  |  |
|  | There were no posters of anything that involved the knee. I would like to be able to look at a drawing of a knee which could be used as a good diagram for the knee. | - |  | There were no posters of anything that involved the knee. I would like to be able to look at a drawing of a knee which could be used as a good diagram for the knee. |
|  | The examination seat | + | The examination seat |  |
|  | The vibrant painting | + |  | The vibrant painting |
|  | The painting was okay | + | The painting was okay |  |
|  | The largeness of the painting | + | the largeness of the painting |  |
|  | The coat rack | + |  | The coat rack |
|  | The details of the photo | + |  | The details of the photo |
|  | The two chairs | + | The two chairs |  |
|  | negative | - | negative |  |
|  | The poster on the wall | + |  | The poster on the wall |
|  | The room was very small | - |  | The room was very small |
|  | The crumpled sheet on the exam table | - |  | The crumpled sheet on the exam table |
|  | Solid color walls | + | Solid color walls |  |
|  | The messy bed | - |  | The messy bed |
|  | The painting looked out of place (too big) | - | The painting looked out of place (too big) |  |
|  | lighting | + | lighting |  |
|  | cleanliness | + | cleanliness |  |
|  | The poster did not match the room | - | The poster did not match the room |  |
|  | The room wasn’t too crowded | + | The room wasn’t too crowded |  |
|  | Was small and the bed seemed to be taking up the entire room | - |  | Was small and the bed seemed to be taking up the entire room |
|  | The bed | + | The bed |  |
|  | Magazines | + |  | Magazines |
| Aspect #3  Blank  (*n*=22) |  |  |  |  |
|  | Minimalist but clear | + | Minimalist but clean |  |
|  | Color scheme | - |  | Color scheme |
|  | emptiness | - |  | emptiness |
|  | Everything looked sanitary | + | Everything looked sanitary |  |
|  | The blankness of the wall | - | The blankness of the wall |  |
|  | The extra chairs present would be good for if I brought family along | + |  | The extra chairs present would be good for if I brought family along |
|  | Exam chair | - |  | Exam chair |
|  | No comment | - | No comment |  |
|  | Darker wall color | - | Darker wall color |  |
|  | 45 minute wait time | - |  | 45 minute wait time |
|  | clean | + | clean |  |
|  | Small, enclosed space | - |  | Small, enclosed space |
|  | No windows | - |  | No windows |
|  | Paper on the bed | + | Paper on the bed |  |
|  | The fact that there was nothing else, no color | - |  | The fact that there was nothing else, no color |
|  | Looks like a confined area | - | Looks like a confined area |  |
|  | Clean and organized | + |  | Clean and organized |
|  | There wasn’t anything else to look at | - | There wasn’t anything else to look at |  |
|  | lighting | - |  | lighting |
|  | No art or visual interest whatsoever | - |  | No art or visual interest whatsoever |
|  | Twisted paper cover | - | Twisted paper cover |  |
|  | No personal accolades | - | No personal accolades |  |
| Aspect #3  Small  (*n* = 19) |  |  |  |  |
|  | painting | + |  | painting |
|  | No objects of specialization or interest (no stethoscope, no pamphlets, no personal items) | - | No objects of specialization or interest (no stethoscope, no pamphlets, no personal items) |  |
|  | The room seemed very clinic | - |  | The room seemed very clinic |
|  | The painting | + |  | The painting |
|  | Couldn’t see windows; not great lighting | - | Couldn’t see windows; not great lighting |  |
|  | Color of the room | - |  | Color of the room |
|  | size | - |  | size |
|  | Bareness of wall around the picture | - | Bareness of wall around the picture |  |
|  | One picture | + |  | One picture |
|  | confined | - | confined |  |
|  | Nothing described on other walls; empty | - | Nothing described on other walls; empty |  |
|  | Size of the room | - | Size of the room |  |
|  | Picture of nature on the wall | + |  | Picture of nature on the wall |
|  | Color of the walls | - | Color of the walls |  |
|  | small | - |  | small |
|  | Wait was not too long | + | Wait was not too long |  |
|  | magazines | + |  | Magazines |
|  | Other available services | + | Other available services |  |
|  | 45 minutes is too long to be waiting in an exam room | - |  | 45 minutes is too long to be waiting in an exam room |
| Aspect #3  Medium  (*n* = 20) |  |  |  |  |
|  | Color of the walls | - |  | Color of the walls |
|  | Fluorescent lighting | - | Fluorescent lighting |  |
|  | The room was overall small but I could not see the entire room | - | The room was overall small but I could not see the entire room |  |
|  | The disposable lining over the chair | + | The disposable lining over the chair |  |
|  | cleanliness | + |  | cleanliness |
|  | table | + |  | table |
|  | Dark-colored wall | - |  | Dark colored wall |
|  | Wall color | - | Wall color |  |
|  | It was apparent it was a doctor’s office | - |  | It was apparent it was a doctor’s office |
|  | Paper on chair was wrinkled |  | Paper on chair was wrinkled |  |
|  | Room looked grim – grey walls, only one decoration, no windows, small | - |  | Room looked grim – grey walls, only one decoration, no windows, small |
|  | The coloring of the walls | - | The coloring of the walls |  |
|  | Scary, anxiety-giving | - |  | Scary, anxiety-giving |
|  | Not a lot of objects and things that might distract the patient and overwhelm the with thoughts | - | Not a lot of objects and things that might distract the patient and overwhelm the with thoughts |  |
|  | The lighting | - |  | The lighting |
|  | The rest of the room wall was blank – no informative posters (suggest that the doctor may not care to allow patients to learn about their symptoms/diseases/prognosis/etc. | - |  | The rest of the room wall was blank – no informative posters (suggest that the doctor may not care to allow patients to learn about their symptoms/diseases/prognosis/etc. |
|  | Work station | + | Work station |  |
|  | The amount of furniture in comparison to the size of the room | - | The amount of furniture in comparison to the size of the room |  |
|  | The sterile feeling of the room | - |  | The sterile feeling of the room |
|  | Very little decoration or personal touches | - | Very little decoration of personal touches |  |
| Aspect #3  Large  (*n*=22) |  |  |  |  |
|  | Didn’t exactly specify what kinds of magazines there were but magazines in a patient exam room seem weird to me | - |  | Didn’t exactly specify what kinds of magazines there were but magazines in a patient exam room seem weird to me |
|  | The simple space | + | The simple space |  |
|  | The desk and two chairs | - |  | The desk and two chairs |
|  | That shade of blue gave me anxiety | - | That shade of blue gave me anxiety |  |
|  | Where the painting was located (above the bed) | + | Where the painting was located (above the bed) |  |
|  | The desks | + |  | The desks |
|  | There was nothing else besides the photo and the bed | - |  | There was nothing else besides the photo and the bed |
|  | The coat hanger | + | The coat hanger |  |
|  | positive | + | positive |  |
|  | The room had no windows | - |  | The room had no windows |
|  | There was only one large picture on the wall | - |  | There was only one large picture on the wall |
|  | The wall color | - |  | The wall color |
|  | Neat table for patient (where patient sits) | + | Neat table for patient (where patient sits) |  |
|  | The magazine cart | + |  | The magazine cart |
|  | The room looks too small | - | The room looks too small |  |
|  | General atmosphere of a doctor’s office | - | General atmosphere of a doctor’s office |  |
|  | Comfortable bed | + | Comfortable bed |  |
|  | The bed-table looked messy | - | The bed-table looked messy |  |
|  | The cleanliness | + | The cleanliness |  |
|  | There was no picture about the rest of the room, or where the doctor sits | - |  | There was no picture about the rest of the room, or where the doctor sits |
|  | No comment |  | No comment |  |
|  | Waiting time | - |  | Waiting time |
|  |  |  |  |  |
